# Supplementary material for: NKX2-5 Variant in Two Siblings with Thyroid Hemiagenesis
Source: MDPI journal article supplement (doi:10.3390/ijms23063414), 2022-03-21
Supplement: s1 [file s1]

# NKX2-5 Variant in Two Siblings with Thyroid Hemiagenesis

Ewelina Szczepanek-Parulska <sup>1,\*</sup>, Bartłomiej Budny <sup>1</sup>, Martyna Borowczyk <sup>2</sup>, Igor Zhukov <sup>3</sup>, Kosma Szutkowski <sup>4</sup>, Katarzyna Zawadzka <sup>5</sup>, Raiha Tahir <sup>1</sup>, Andrzej Minczykowski <sup>6</sup>, Marek Niedziela <sup>7,†</sup> and Marek Ruchała <sup>1,†</sup>

<sup>1</sup> Department of Endocrinology, Metabolism and Internal Diseases, Poznan University of Medical Sciences, 61-701 Poznan, Poland; bbudny@ump.edu.pl (B.B.);

raiha.tahir@outlook.com (R.T.);

mruchala@ump.edu.pl (M.R.)

<sup>2</sup> Department of Medical Simulation, Poznan University of Medical Sciences, 61-701 Poznan, Poland; martyna.borowczyk@ump.edu.pl

<sup>3</sup> Polish Academy of Sciences, Institute of Biochemistry and Biophysics, 02-106 Warsaw, Poland; igor@ibb.waw.pl

<sup>4</sup> NanoBioMedical Centre, Adam Mickiewicz University, 61-614 Poznan, Poland; kosma\_sz@amu.edu.pl

<sup>5</sup> MNM Diagnostics Sp. z o.o, 61-695 Poznan, Poland; katarzyna.zawadzka@mnmbio

<sup>6</sup> Department of Intensive Cardiological Care and Internal Medicine, Poznan University of Medical Sciences, 61-701 Poznan, Poland; anmin@ump.edu.pl

<sup>7</sup> Department of Pediatric Endocrinology and Rheumatology, Institute of Pediatrics, Poznan University of Medical Sciences, 61-701 Poznan, Poland; mniedzie@ump.edu.pl

\* Correspondence: ewelina@ump.edu.pl; Tel.: +48-61-869-13-30 (ext. 1682)

† These authors contributed equally to this work.

## Supplementary Materials

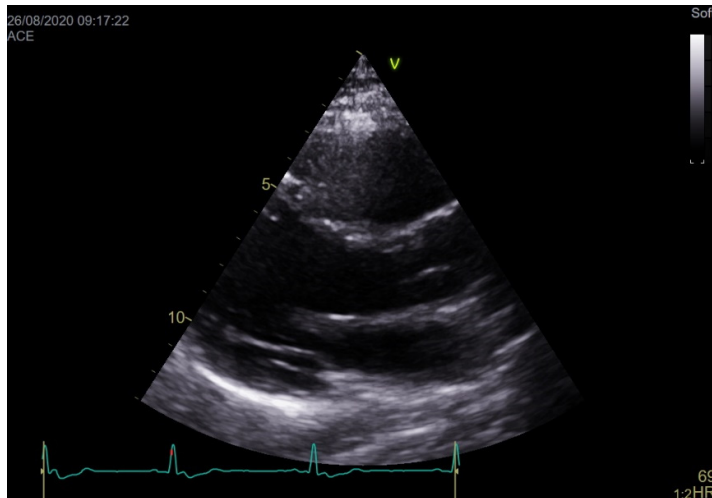

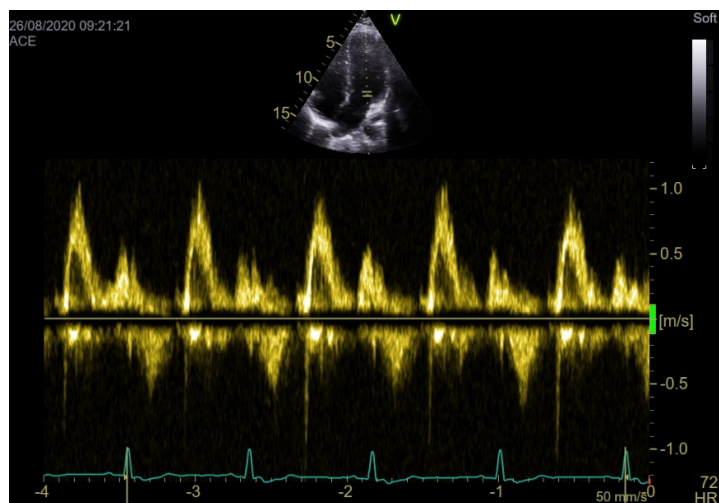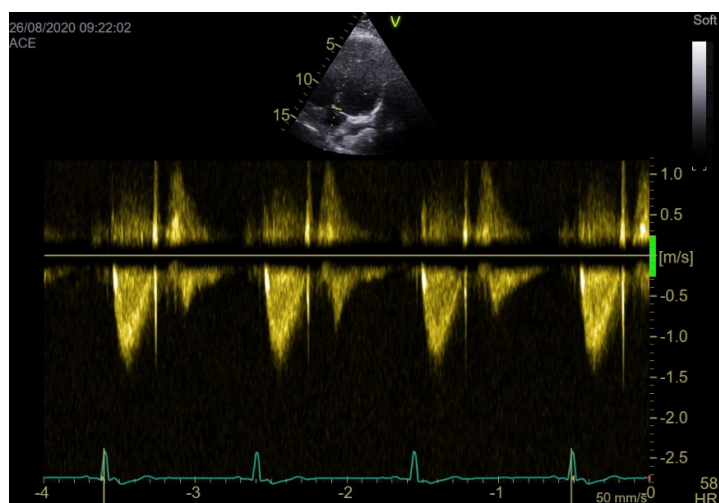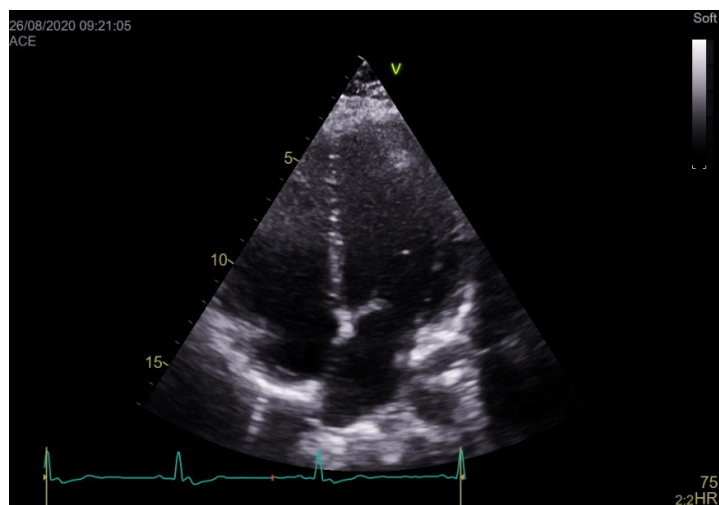

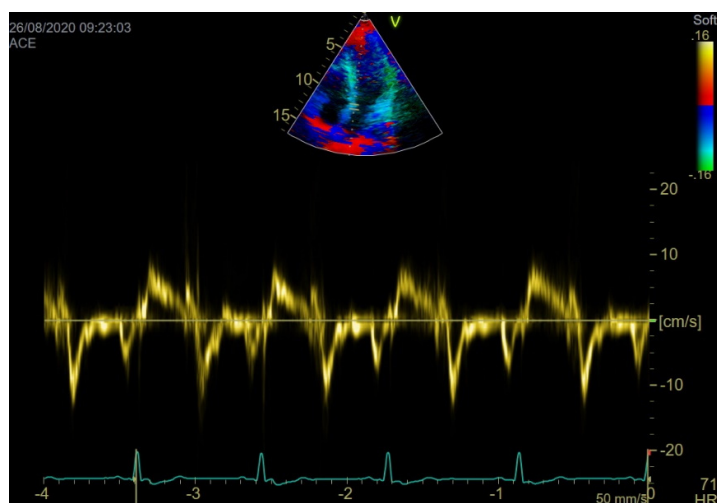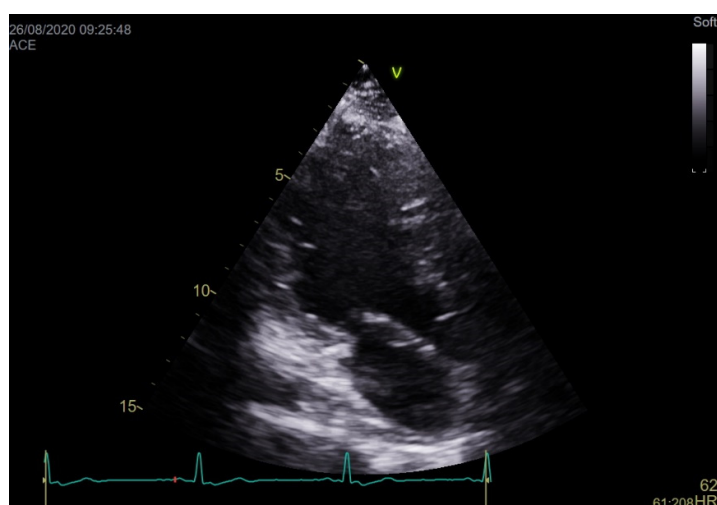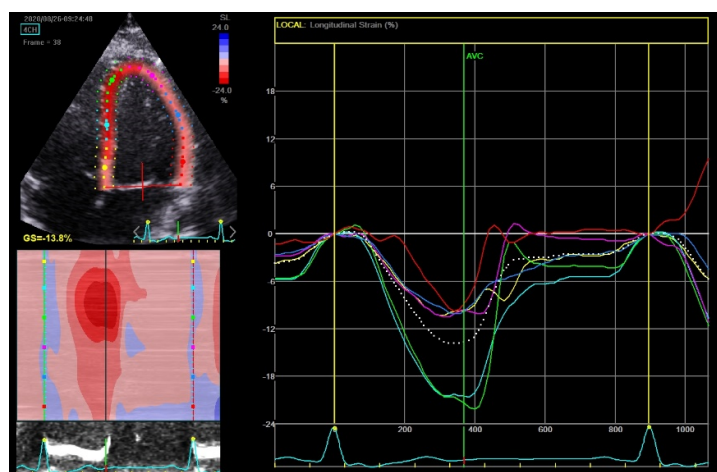

**Supplementary Figures S1–S7** Images from echocardiographic examination of the male proband. 1 - parasternal long axis view (PLAX) view, 2D presentation, 2 - 4C view, pulsed wave doppler (PW), mitral inflow, 3 - 5C view, continuous wave doppler (CW), aortic valve flow, 4 - 4C view, 2D presentation, 5 - 4C view, tissue doppler (TDI), movement of the mitral valve ring, 6 - 3C view, 2D presentation, 7- 4C view, left ventricular strain.
