# Supplementary material for: NKX2-5 Variant in Two Siblings with Thyroid Hemiagenesis
Source: MDPI journal article supplement (doi:10.3390/ijms23063414), 2022-03-21
Supplement: s1 [file s1]

# The homology modelling results

## 1. PSI-BLAST

3 PSI-BLAST iterations were performed to extract the position specific scoring matrix (PSSM) from UniRef90 database. 109 hits were found in overall. 5 templates were selected with a highest total scores for both proteins. Templates for homology modelling for both NKX2-5 normal and variant are shown in Tab.S1.

**Table S1. The selected templates for homology modelling (both normal and variant)**

| Template | Total score | BLAST E-value | Align score | Cover | ID     | Resolution     | Header                                                                                                                                                             |
|----------|-------------|---------------|-------------|-------|--------|----------------|--------------------------------------------------------------------------------------------------------------------------------------------------------------------|
| 1        | 90.95       | 2,00E-21      | 240.0       | 53%   | 5FLV-I | 3.00 Å         | XRAY Homeobox protein Nkx-2.5 [Mus musculus] <NKX25_MOUSE(134-197)> (226 residues with quality score 0.717), released 2016-02-10                                   |
| 2        | 43.08       | 2,00E-26      | 255.0       | 21%   | 1FTT-A | Unknown or NMR | NMR Homeobox protein Nkx-2.1 [Rattus norvegicus] <NKX21_RAT(161-227)> (68 residues with quality score 0.805), released 1996-01-29                                  |
| 3        | 35.92       | 2,00E-18      | 113.0       | 32%   | 6M3D-C | 1.60 Å         | XRAY Segmentation polarity homeobox protein engrailed [Drosophila melanogaster] <HMEN_DROME(453-512)> (108 residues with quality score 1.000), released 2020-09-16 |
| 4        | 30.41       | 4,00E-20      | 175.0       | 21%   | 2L9R-A | Unknown or NMR | NMR Homeobox protein Nkx-3.1 [Homo sapiens] <NKX31_HUMAN(132-189)> (69 residues with quality score 0.816), released 2011-04-20                                     |
| 5        | 30.41       | 2,00E-25      | 164.0       | 19%   | 4RDU-D | 1.85 Å         | XRAY Homeobox protein DLX-5 [Homo sapiens] <DLX5_HUMAN(135-198)> (62 residues with quality score 0.969), released 2014-11-19                                       |

## 2. FASTA sequences

Fasta sequence for NKX2-5 (normal)

>NKX2-5

```
MFPSPALTPTPFSVKDILNLEQQQRLAAAGELSARLEATLAPSSCMLAAFKPEAYAGPE
AAAPGLPELRAELGRAPSPAKCASAFPAAPAFYPRAYSDPDPKDPRAEKKELCALQKAV
ELEKTEADNAERPRARRRRKPRVLFSQAQVYELERRFKQQRYSAPERDQLASVLKLTST
QVKIWFQNRRYKCKRQRQDQTLELVGLPPPPPPARRIAVPVLVRDGGKCLGDSAPYAPA
YGVGLNPYGYNAYPAYPGYGGAAACSPGYSCTAAYPAGPSPAQPATAAANNFVNFVGVGDL
NAVQSPGIPQNSGVSTLHGIRAW
```

Fasta sequence for NKX2-5 (mutation)

>NKX2-5 P.PRO280LEU.

```
MFPSPALTPTPFSVKDILNLEQQQRLAAAGELSARLEATLAPSSCMLAAFKPEAYAGPE
AAAPGLPELRAELGRAPSPAKCASAFPAAPAFYPRAYSDPDPKDPRAEKKELCALQKAV
```

ELEKTEADNAERPRARRRRRKPRVLFSQAQVYELERRFKQQRYSAPERDQLASVLKLTST  
 QVKIWFQNRRYKCKRQRQDQTLELVGLPPPPPPPARRIAVPVLVRDGGKPCLGDSAPYAPA  
 YGVGLNPYGYNAYPAYPGYGGAACSPGYSCTAAYPAGPSLAQPATAAANNFVNFGVGD  
 NAVQSPGIPQSNSGVSTLHGIRAW

### 3. Models used during homology modelling for NKX2-5 normal

**Table S2. The list of 13 models sorted by their Z-scores for NKX2-5 normal**

| Rank | Z-score | Structure                                                                           | State   | Model ID | Filename                            | Original number | Residues | Comment      |
|------|---------|-------------------------------------------------------------------------------------|---------|----------|-------------------------------------|-----------------|----------|--------------|
| 1    | 1.443   |    | monomer | 1FTT-A   | <a href="#">nkx2-5_1ftt-a.yob</a>   | 6               | 143-197  | Optimal      |
| 2    | 1.165   |    | monomer | 4RDU-D   | <a href="#">nkx2-5_4rdu-d.yob</a>   | 13              | 138-198  | Optimal      |
| 3    | 0.799   |    | monomer | 2L9R-A   | <a href="#">nkx2-5_2l9r-a.yob</a>   | 12              | 145-196  | Optimal      |
| 4    | -0.805  |    | monomer | 6M3D-C01 | <a href="#">nkx2-5_6m3d-c01.yob</a> | 7               | 9-197    | Good         |
| 5    | -0.894  |    | monomer | 6M3D-C03 | <a href="#">nkx2-5_6m3d-c03.yob</a> | 9               | 9-197    | Good         |
| 6    | -0.978  |   | monomer | 6M3D-C05 | <a href="#">nkx2-5_6m3d-c05.yob</a> | 11              | 9-197    | Good         |
| 7    | -1.177  |  | monomer | 6M3D-C04 | <a href="#">nkx2-5_6m3d-c04.yob</a> | 10              | 9-197    | Satisfactory |
| 8    | -1.296  |  | monomer | 6M3D-C02 | <a href="#">nkx2-5_6m3d-c02.yob</a> | 8               | 9-197    | Satisfactory |
| 9    | -2.466  |  | monomer | 5FLV-I02 | <a href="#">nkx2-5_5flv-i02.yob</a> | 2               | 141-324  | Poor         |
| 10   | -2.606  |  | monomer | 5FLV-I01 | <a href="#">nkx2-5_5flv-i01.yob</a> | 1               | 141-324  | Poor         |
| 11   | -2.684  |  | monomer | 5FLV-I03 | <a href="#">nkx2-5_5flv-i03.yob</a> | 3               | 141-324  | Poor         |
| 12   | -2.859  |  | monomer | 5FLV-I04 | <a href="#">nkx2-5_5flv-i04.yob</a> | 4               | 141-324  | Poor         |
| 13   | -2.936  |  | monomer | 5FLV-I05 | <a href="#">nkx2-5_5flv-i05.yob</a> | 5               | 141-324  | Poor         |

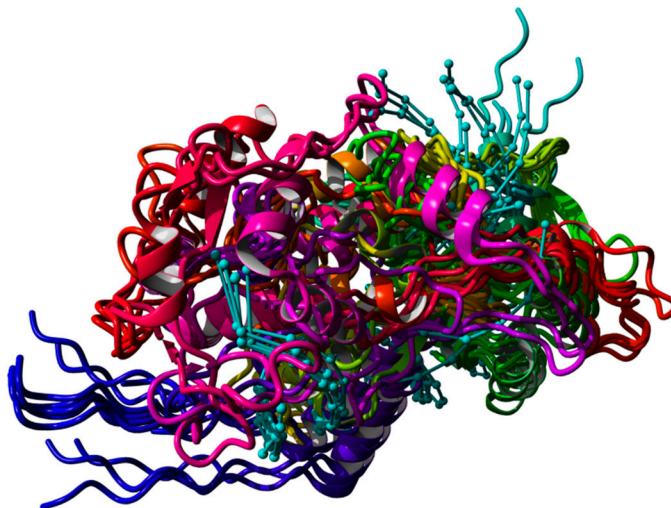

**Figure S8.** Aligned models from Tab. S2 (file nkx2-5\_normal\_13models.pdb)

**Table S3.** List of hybrid models obtained from the best parts of models listed in Tab.S2

| Transfer | First residue | Last residue | Length | From model | Score                  |
|----------|---------------|--------------|--------|------------|------------------------|
| 1        | 126           | 210          | 85     | 4RDU-D     | <b>-6.419</b>          |
| 2        | 1             | 145          | 145    | 6M3D-C05   | <b>-4.417</b> accepted |
| 3        | 190           | 324          | 135    | 5FLV-I03   | <b>-2.657</b> accepted |
| 6        | 144           | 157          | 14     | 6M3D-C02   | <b>-2.655</b> accepted |
| 7        | 119           | 127          | 9      | 6M3D-C03   | <b>-2.638</b> accepted |
| 8        | 141           | 157          | 17     | 6M3D-C04   | <b>-2.604</b> accepted |
| 9        | 140           | 159          | 20     | 6M3D-C04   | <b>-2.597</b> accepted |
| 10       | 146           | 159          | 14     | 6M3D-C04   | <b>-2.578</b> accepted |
| 11       | 149           | 157          | 9      | 6M3D-C02   | <b>-2.573</b> accepted |
| 12       | 146           | 157          | 12     | 6M3D-C02   | <b>-2.540</b> accepted |
| 13       | 148           | 159          | 12     | 6M3D-C04   | <b>-2.535</b> accepted |
| 16       | 210           | 215          | 6      | 5FLV-I02   | <b>-2.530</b> accepted |

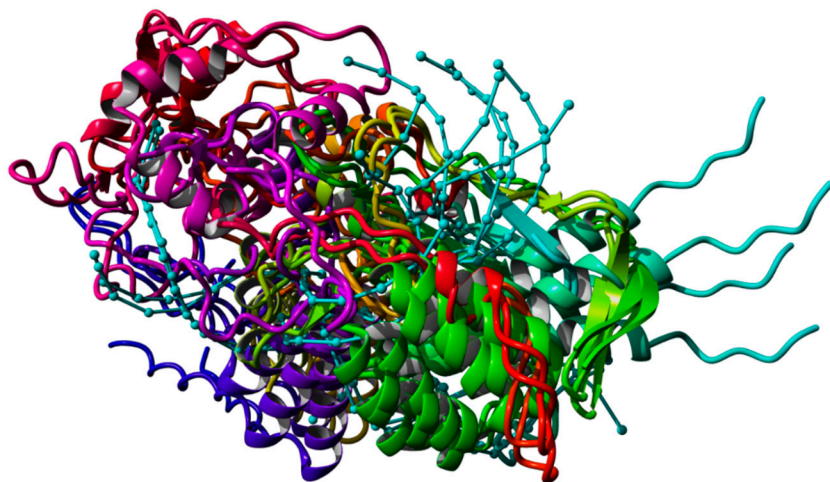

Figure S9 Superimposed hybrid models from Tab.S3 (file nkx2-5\_normal\_7models.pdb)

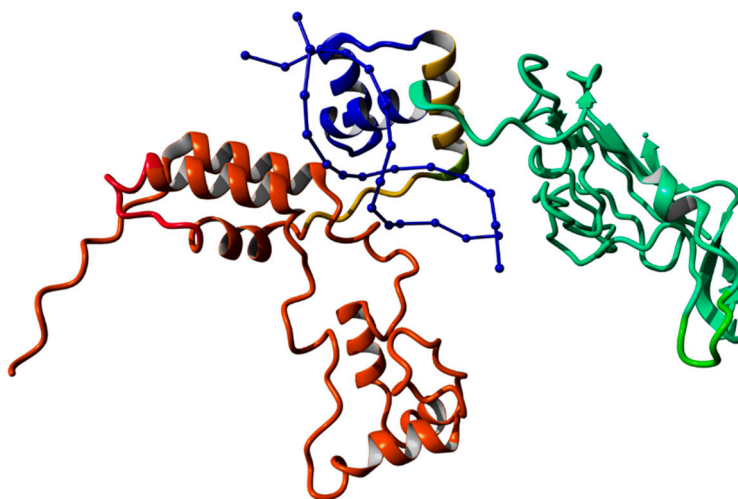

Figure S10 Final model for NKX2-5 normal with an overall Z-score -2.250 (Dihedrals -3.003 bad, Packing 1D - 1.805 satisfactory, Packing 3D -2.389 poor). (file nkx2-5\_normal.pdb)

#### 4. Models used during homology modelling for NKX2-5 variant

**Table S4. The list of 13 models sorted by their Z-scores for NKX2-5 variant**

| Rank | Z-score | Structure                                                                          | State   | Model ID | Filename                                         | Original number | Residues | Comment      |
|------|---------|------------------------------------------------------------------------------------|---------|----------|--------------------------------------------------|-----------------|----------|--------------|
| 1    | 1.443   |   | monomer | 1FTT-A   | <a href="#">nkx2-5 p.Pro280Leu. 1ftt-a.yob</a>   | 6               | 143-197  | Optimal      |
| 2    | 1.165   |   | monomer | 4RDU-D   | <a href="#">nkx2-5 p.Pro280Leu. 4rd-d.yob</a>    | 13              | 138-198  | Optimal      |
| 3    | 0.799   |   | monomer | 2L9R-A   | <a href="#">nkx2-5 p.Pro280Leu. 2l9r-a.yob</a>   | 12              | 145-196  | Optimal      |
| 4    | -0.805  |   | monomer | 6M3D-C01 | <a href="#">nkx2-5 p.Pro280Leu. 6m3d-c01.yob</a> | 7               | 9-197    | Good         |
| 5    | -0.894  |   | monomer | 6M3D-C03 | <a href="#">nkx2-5 p.Pro280Leu. 6m3d-c03.yob</a> | 9               | 9-197    | Good         |
| 6    | -0.978  |   | monomer | 6M3D-C05 | <a href="#">nkx2-5 p.Pro280Leu. 6m3d-c05.yob</a> | 11              | 9-197    | Good         |
| 7    | -1.177  |   | monomer | 6M3D-C04 | <a href="#">nkx2-5 p.Pro280Leu. 6m3d-c04.yob</a> | 10              | 9-197    | Satisfactory |
| 8    | -1.296  |   | monomer | 6M3D-C02 | <a href="#">nkx2-5 p.Pro280Leu. 6m3d-c02.yob</a> | 8               | 9-197    | Satisfactory |
| 9    | -2.359  |   | monomer | 5FLV-I02 | <a href="#">nkx2-5 p.Pro280Leu. 5flv-i02.yob</a> | 2               | 141-324  | Poor         |
| 10   | -2.492  |   | monomer | 5FLV-I04 | <a href="#">nkx2-5 p.Pro280Leu. 5flv-i04.yob</a> | 4               | 141-324  | Poor         |
| 11   | -2.774  |   | monomer | 5FLV-I05 | <a href="#">nkx2-5 p.Pro280Leu. 5flv-i05.yob</a> | 5               | 141-324  | Poor         |
| 12   | -2.828  |   | monomer | 5FLV-I01 | <a href="#">nkx2-5 p.Pro280Leu. 5flv-i01.yob</a> | 1               | 141-324  | Poor         |
| 13   | -2.973  |  | monomer | 5FLV-I03 | <a href="#">nkx2-5 p.Pro280Leu. 5flv-i03.yob</a> | 3               | 141-324  | Poor         |

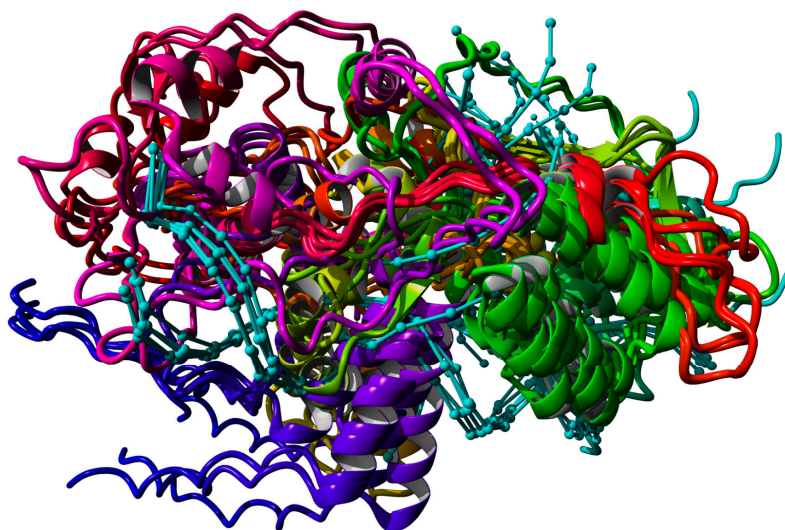

**Figure S11. Aligned models from Tab. S2 (file nkx2-5\_variant\_13models.pdb)**

**Table S5. List of hybrid models obtained from the best parts of models listed in Tab.S4**

| Transfer | First residue | Last residue | Length | From model | Score                  |
|----------|---------------|--------------|--------|------------|------------------------|
| 1        | 126           | 210          | 85     | 4RDU-D     | <b>-6.419</b>          |
| 2        | 1             | 145          | 145    | 6M3D-C05   | <b>-4.419</b> accepted |
| 3        | 190           | 324          | 135    | 5FLV-I05   | <b>-2.704</b> accepted |
| 4        | 141           | 157          | 17     | 6M3D-C04   | <b>-2.688</b> accepted |
| 5        | 146           | 159          | 14     | 6M3D-C04   | <b>-2.678</b> accepted |
| 6        | 119           | 127          | 9      | 6M3D-C03   | <b>-2.649</b> accepted |
| 7        | 144           | 157          | 14     | 6M3D-C02   | <b>-2.629</b> accepted |
| 8        | 152           | 157          | 6      | 6M3D-C04   | <b>-2.612</b> accepted |
| 10       | 181           | 198          | 18     | 5FLV-I02   | <b>-2.608</b> accepted |
| 11       | 170           | 187          | 18     | 5FLV-I02   | <b>-2.574</b> accepted |
| 12       | 119           | 122          | 4      | 6M3D-C03   | <b>-2.572</b> accepted |
| 13       | 184           | 189          | 6      | 6M3D-C02   | <b>-2.549</b> accepted |
| 15       | 210           | 215          | 6      | 5FLV-I02   | <b>-2.545</b> accepted |
| 16       | 119           | 122          | 4      | 6M3D-C03   | <b>-2.522</b> accepted |
| 18       | 152           | 155          | 4      | 6M3D-C04   | <b>-2.514</b> accepted |
| 20       | 209           | 214          | 6      | 5FLV-I05   | <b>-2.511</b> accepted |

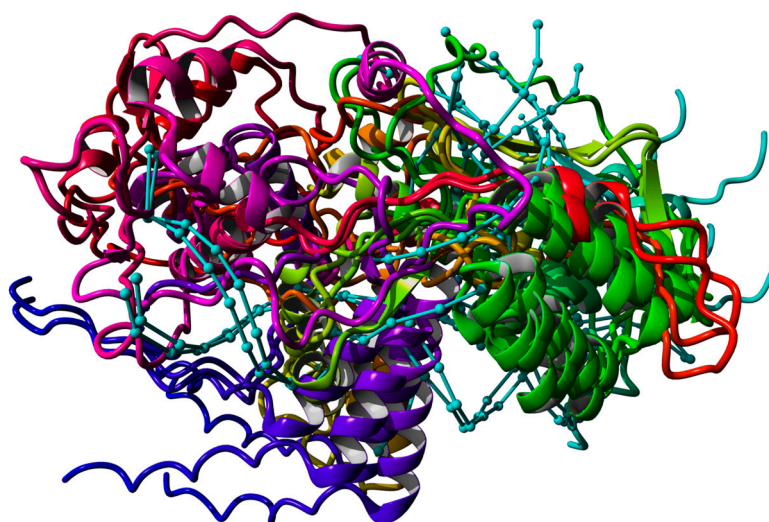

**Figure S12. Aligned models from Tab. S5 (file nkx2-5\_variant\_7models.pdb)**

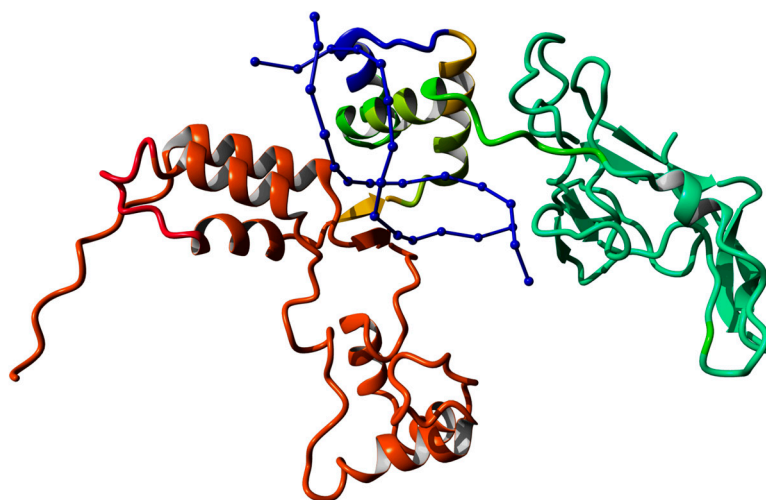

Figure S13. Final model for NKX2-5 variant with an overall Z-score -2.310 (Dihedrals -3.261 bad, Packing 1D - 1.845 satisfactory, Packing 3D -2.404 poor). (file nkx2-5\_variant.pdb)
